# Supplementary material
Source: Springer Nature journal article supplement (https://www.springerprofessional.de/resource/supplementary/40294_2012_8_MOESM2_ESM.pdf/11899552)
Supplement: MOESM2 [file 11899552]

**A**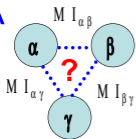

$$\text{Min}\{MI_{\alpha\beta}, MI_{\beta\gamma}, MI_{\alpha\gamma}\} = MI_{\alpha\beta}$$

$$MI_{\alpha\beta} < \text{DPI}_{\text{tol}}$$

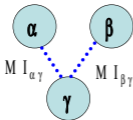**B**

$$MI_{\alpha\beta} > \text{DPI}_{\text{tol}}$$

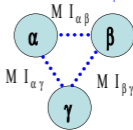**C**
